# Supplementary material
Source: ML conference proceedings conference paper supplement (https://proceedings.neurips.cc/paper_files/paper/2013/hash/1896a3bf730516dd643ba67b4c447d36-Abstract.html)
Supplement: Supplementary file [file 1896a3bf730516dd643ba67b4c447d36-Supplemental.zip]

---

# Integrated Non-Factorized Variational Inference Supplementary Material

---

**Shaobo Han**  
Duke University  
Durham, NC 27708  
shaobo.han@duke.edu

**Xuejun Liao**  
Duke University  
Durham, NC 27708  
xjliao@duke.edu

**Lawrence Carin**  
Duke University  
Durham, NC 27708  
lcarin@duke.edu

### Proof of Theorem 3.1

Each inequality is obtained by first applying Lemma 3.2 and then Lemma 3.3,

$$\begin{aligned} \sum_{j=1}^p \sqrt{d_j} &\leq \sqrt{p \sum_{j=1}^p d_j} = \sqrt{p} \operatorname{tr}(\mathbf{D}) = \sqrt{p} \operatorname{tr}(\mathbf{A}^2) \leq \sqrt{p} \operatorname{tr}(\mathbf{A}) = \sqrt{p} \operatorname{tr}(\sqrt{\mathbf{D}}), \\ \sum_{j=1}^p \sqrt{d_j} &\geq \sqrt{\sum_{j=1}^p d_j} = \operatorname{tr}(\mathbf{D}) = \operatorname{tr}(\mathbf{A}^2) \geq \frac{1}{\sqrt{p}} \operatorname{tr}(\mathbf{A}) = \frac{1}{\sqrt{p}} \operatorname{tr}(\sqrt{\mathbf{D}}). \end{aligned}$$

Theorem 3.2 holds according to the upper bound of KL divergence and the proof is straightforward.

### Proof of Theorem 3.3

To see the first inequality in (17), we have

$$\begin{aligned} g_1(\boldsymbol{\mu}) - f_1(\boldsymbol{\mu}) &= \frac{\operatorname{tr}(\boldsymbol{\Phi}'\boldsymbol{\Phi}\mathbf{D})}{2\sigma^2} + \frac{\lambda}{\sigma} \mathbb{E}_q(\|\mathbf{x}\|_1 - \|\boldsymbol{\mu}\|_1) \leq \frac{\operatorname{tr}(\boldsymbol{\Phi}'\boldsymbol{\Phi}\mathbf{D})}{2\sigma^2} + \frac{\lambda}{\sigma} \mathbb{E}_q(\|\mathbf{x} - \boldsymbol{\mu}\|_1) \\ &= \frac{\operatorname{tr}(\boldsymbol{\Phi}'\boldsymbol{\Phi}\mathbf{D})}{2\sigma^2} + \frac{\lambda}{\sigma} \sqrt{\frac{2}{\pi}} \sum_j \sqrt{d_j} \leq \frac{\operatorname{tr}(\boldsymbol{\Phi}'\boldsymbol{\Phi}\mathbf{D})}{2\sigma^2} + \frac{\lambda}{\sigma} \sqrt{\frac{2p}{\pi}} \operatorname{tr}(\sqrt{\mathbf{D}}) \end{aligned}$$

holds for any  $\boldsymbol{\mu} \in \mathbb{R}^p$ . Note that  $f(\boldsymbol{\mu}, \mathbf{D})$  is an upper bound of  $g(\boldsymbol{\mu}, \mathbf{D})$ ,  $f_1(\boldsymbol{\mu}^*) \leq g_1(\boldsymbol{\mu}^*)$  (the proof is straightforward). Thus the first inequality in (18a) holds. The second inequality holds since  $\boldsymbol{\mu}^*$  is the global minimum of  $g_1(\boldsymbol{\mu})$ . To see the second inequality in (17), we have that

$$\begin{aligned} f(\boldsymbol{\mu}, \mathbf{D}) - g(\boldsymbol{\mu}, \mathbf{D}) &= \frac{\lambda}{\sigma} \sqrt{\frac{2p}{\pi}} \operatorname{tr}(\sqrt{\mathbf{D}}) + \frac{\lambda}{\sigma} \mathbb{E}_q(\|\boldsymbol{\mu}\|_1 - \|\mathbf{x}\|_1) \leq \frac{\lambda}{\sigma} \sqrt{\frac{2p}{\pi}} \operatorname{tr}(\sqrt{\mathbf{D}}) + \frac{\lambda}{\sigma} \mathbb{E}_q(\|\boldsymbol{\mu} - \mathbf{x}\|_1) \\ &= \frac{\lambda}{\sigma} \sqrt{\frac{2p}{\pi}} \operatorname{tr}(\sqrt{\mathbf{D}}) + \frac{\lambda}{\sigma} \sqrt{\frac{2}{\pi}} \sum_j \sqrt{d_j} \leq 2 \frac{\lambda}{\sigma} \sqrt{\frac{2p}{\pi}} \operatorname{tr}(\sqrt{\mathbf{D}}) \end{aligned}$$

holds for any  $(\boldsymbol{\mu}, \mathbf{D}) \in \mathbb{R}^p \times \mathbb{S}_{++}^p$ . The first inequality in (18b) holds since  $f(\boldsymbol{\mu}, \mathbf{D})$  is an upper bound of  $g(\boldsymbol{\mu}, \mathbf{D})$ ; the second inequality holds since  $(\hat{\boldsymbol{\mu}}, \hat{\mathbf{D}})$  is the global minimum of  $f(\boldsymbol{\mu}, \mathbf{D})$ .

### Bayesian Lasso Model (Scaled Case)

According to [1], the Bayesian Lasso model with the scale-mixture of normal representation is as follows,

$$\begin{aligned} \mathbf{y}|\mathbf{x}, \sigma^2 &\sim \mathcal{N}_n(\mathbf{y}; \boldsymbol{\Phi}\mathbf{x}, \sigma^2 \mathbf{I}_n) \\ \mathbf{x}|\sigma^2, \tau_1^2, \dots, \tau_p^2 &\sim \mathcal{N}_p(\mathbf{x}; \mathbf{0}_p, \sigma^2 \mathbf{D}_\tau), \quad \mathbf{D}_\tau = \operatorname{diag}(\tau_1^2, \dots, \tau_p^2) \\ \tau_1^2, \dots, \tau_p^2 &\sim \prod_{j=1}^p \frac{\lambda^2}{2} \exp(-\lambda^2 \tau_j^2 / 2) d\tau_j^2, \quad \tau_1^2, \dots, \tau_p^2 > 0, \quad j = 1, \dots, p \\ \gamma_j &\sim \frac{\lambda^2}{2} \exp(-\lambda^2 / 2\gamma_j) \gamma_j^{-2}, \quad \gamma_j = 1/\tau_j^2, \quad j = 1, \dots, p \end{aligned}$$

$$\begin{aligned}\sigma^2 &\sim \text{InvGamma}(\sigma^2; a, b) \\ \lambda^2 &\sim \text{Gamma}(\lambda^2; r, s)\end{aligned}\quad (1)$$

where representation of Laplace distribution as a scale mixture of normals (with an exponential mixing density) is exploited,

$$\frac{t}{2} \exp(-t|z|) = \int_0^\infty \frac{1}{\sqrt{2\pi s}} \exp(-z^2/(2s)) \frac{t^2}{2} \exp(-t^2 s/2) ds \quad (2)$$

where  $t > 0$ ,  $t = \lambda/\sigma$ ,  $s = \sigma^2 \tau_j^2 = \sigma^2/\gamma_j$ .

### Data-Augmentation Gibbs Sampler

The full likelihood can be written as follows,

$$\begin{aligned}p(\mathbf{y}|\mathbf{x}, \sigma^2)p(\mathbf{x}|\sigma^2, \gamma)p(\gamma)p(\sigma^2)p(\lambda^2) &= \mathcal{N}_n(\mathbf{y}; \Phi\mathbf{x}, \sigma^2\mathbf{I}_n)\mathcal{N}_p(\mathbf{x}; \mathbf{0}_p, \sigma^2\mathbf{D}_\tau) \left( \prod_{i=1}^p p(\gamma_j) \right) p(\sigma^2)p(\lambda) \\ &= \frac{1}{(2\pi)^{n/2}|\sigma^2\mathbf{I}_n|^{1/2}} \exp\left(-\frac{(\mathbf{y} - \Phi\mathbf{x})^T(\mathbf{y} - \Phi\mathbf{x})}{2\sigma^2}\right) \times \frac{1}{(2\pi)^{p/2}[\prod_{j=1}^p \sigma^2/\gamma_j]^{1/2}} \exp\left(-\frac{\mathbf{x}^T\mathbf{D}_\tau^{-1}\mathbf{x}}{2\sigma^2}\right) \\ &\times \prod_{j=1}^p \left( \frac{\lambda^2}{2} \exp(-\lambda^2/(2\gamma_j))(\gamma_j^{-2}) \right) \times \frac{b^a}{\Gamma(a)} (\sigma^2)^{-(a+1)} \exp(-b/\sigma^2) \times \frac{s^r}{\Gamma(r)} \lambda^{2(r-1)} \exp(-s\lambda^2)\end{aligned}\quad (3)$$

where  $\mathbf{D}_\tau = \text{diag}(1/\gamma_1, \dots, 1/\gamma_p)$ .

- Full Conditional distribution of  $\mathbf{x}$ :

$$(\mathbf{x}|\mathbf{y}, \sigma^2, \tau_1^2, \dots, \tau_p^2) \sim \mathcal{N}_p(\mathbf{x}; (\mathbf{D}_\tau^{-1} + \Phi^T\Phi)^{-1}\Phi^T\mathbf{y}, \sigma^2(\mathbf{D}_\tau^{-1} + \Phi^T\Phi)^{-1}) \quad (4)$$

- Full Conditional distribution of  $\sigma^2$ :

$$(\sigma^2|\mathbf{y}, \tau_1^2, \dots, \tau_p^2) \sim \text{InvGamma}(\sigma^2; \frac{n+p-1}{2} + a, \frac{(\mathbf{y} - \Phi\mathbf{x})^T(\mathbf{y} - \Phi\mathbf{x}) + \mathbf{x}^T\mathbf{D}_\tau^{-1}\mathbf{x}}{2} + b) \quad (5)$$

- Full Conditional distribution of  $\gamma_j = 1/\tau_j^2$ :

$$p(1/\tau_j^2|\lambda^2, \sigma^2, x_j) \propto (1/\tau_j^2)^{-\frac{3}{2}} \exp\left\{-\left(\frac{x_j/\tau_j^2 - \lambda\sigma^2}{2\sigma^2(1/\tau_j^2)}\right)\right\} \sim \text{InvGaussian}(1/\tau_j^2; g, h) \quad (6)$$

where  $g = \sqrt{\lambda^2\sigma^2/x_j^2}$  and  $h = \lambda^2$ .

- Full Conditional distribution of  $\lambda^2$ :

$$(\lambda^2|\tau_j^2) \sim \text{Gamma}(\lambda^2; p+r, s + \sum_{j=1}^p \frac{\tau_j^2}{2}) \quad (7)$$

### Mean-field VB

We seek a variational distribution  $q(\Theta; \Gamma)$  to approximate the exact posterior  $p(\Theta; \Gamma)$ , where  $\Theta \equiv \{\mathbf{x}, \gamma, \sigma^2, \lambda^2\}$ ,  $\Gamma$  are the variational parameters. Consider the variational expression,

$$\tilde{F}(\Gamma) = \int d\Theta q(\Theta; \Gamma) \ln \frac{q(\Theta; \Gamma)}{p(\mathbf{y})p(\Theta|\mathbf{y})} = -\ln p(\mathbf{y}) + \text{KL}(q(\Theta; \Gamma)||p(\Theta|\mathbf{y})) \quad (8)$$

Note that the term  $p(\mathbf{y})$  is a constant with respect to  $\Gamma$ , and therefore the evidence lower bound  $\tilde{F}(\Gamma)$  is maximized when the Kullback-Leibler divergence  $\text{KL}(q(\Theta; \Gamma)||p(\Theta|\mathbf{y}))$  is minimized. To make the computation of  $\tilde{F}(\Gamma)$  tractable, we assume  $q(\Theta; \Gamma)$  has a factorized form,

$$q(\Theta; \Gamma) = \prod_{i=1}^k q_i(\Theta_i; \Gamma_i) \quad (9)$$

With appropriate choice of  $q_i$ , the variational expression  $\tilde{F}(\Gamma)$  may be evaluated analytically. Maximizing the lower bound  $\tilde{F}(\Gamma)$  with respect to  $q_i^*(\Theta_i; \Gamma_i)$  yields

$$q_i^*(\Theta_i; \Gamma_i) = \frac{\exp(\mathbb{E}_{i \neq j}[\ln p(\mathbf{y}, \Theta)])}{\int \exp(\mathbb{E}_{i \neq j}[\ln p(\mathbf{y}, \Theta)]) d\Theta_i} \quad (10)$$

The update equations are as follows,

- Update for  $\mathbf{x}$ :

$$q^*(\mathbf{x}|-) \sim \mathcal{N}(\mathbf{x}; \hat{\boldsymbol{\mu}}, \hat{\boldsymbol{\Sigma}})$$

$$\hat{\boldsymbol{\mu}} = \left( \langle \mathbf{D}_{\tau}^{-1} \rangle + \boldsymbol{\Phi}^T \boldsymbol{\Phi} \right)^{-1} \boldsymbol{\Phi}^T \mathbf{y}, \quad \hat{\boldsymbol{\Sigma}} = \left[ \langle \sigma^{-2} \rangle \left( \langle \mathbf{D}_{\tau}^{-1} \rangle + \boldsymbol{\Phi}^T \boldsymbol{\Phi} \right) \right]^{-1} \quad (11)$$

where  $\langle \sigma^{-2} \rangle = \hat{a}/\hat{b}$

- Update for  $\sigma^{-2}$ :

$$\begin{aligned} q^*(\sigma^{-2}|-) &\sim \text{Gamma}(\sigma^{-2}; \hat{a}, \hat{b}) \\ \hat{a} &= \frac{n+p-1}{2} + a \\ \hat{b} &= \frac{1}{2} \mathbf{y}^T \mathbf{y} - \mathbf{y}^T \boldsymbol{\Phi} \langle \mathbf{x} \rangle + \frac{1}{2} \text{trace} \left[ \left( \boldsymbol{\Phi}^T \boldsymbol{\Phi} + \langle \mathbf{D}_{\tau}^{-1} \rangle \right) \langle \mathbf{x} \mathbf{x}^T \rangle \right] + b \end{aligned} \quad (12)$$

where  $\langle \mathbf{x} \rangle = \hat{\boldsymbol{\mu}}$ ,  $\langle \mathbf{x} \mathbf{x}^T \rangle = \hat{\boldsymbol{\mu}} \hat{\boldsymbol{\mu}}^T + \hat{\boldsymbol{\Sigma}}$ .

- Update for  $\lambda^2$ :

$$q^*(\lambda^2|-) \sim \text{Gamma}(\lambda^2; \hat{r}, \hat{s}), \quad \hat{r} = p + r, \quad \hat{s} = \sum_{j=1}^p \left\langle \frac{1}{2\gamma_j} \right\rangle + s \quad (13)$$

- Update for  $\gamma_j$ ,  $j = 1, \dots, p$ :

$$q^*(\gamma_j|-) \sim \text{InvGaussian}(\gamma_j; \hat{g}_j, \hat{h}_j), \quad \hat{g}_j = \sqrt{\frac{\langle \lambda^2 \rangle}{\langle \sigma^{-2} \rangle \langle x_j^2 \rangle}}, \quad \hat{h}_j = \langle \lambda^2 \rangle \quad (14)$$

where  $\text{InvGaussian}(x; g, h) = \sqrt{\frac{h}{2\pi x^3}} \exp\left(-\frac{h(x-g)^2}{2g^2 x}\right)$

( $x > 0$ ) denotes the inverse Gaussian distribution with mean  $\langle x \rangle = g$  and  $\langle x^{-1} \rangle = g^{-1} + h^{-1}$ . We have

$$\langle \lambda^2 \rangle = \hat{r}/\hat{s}, \quad \langle x_j^2 \rangle = \hat{\mu}_j^2 + \hat{\boldsymbol{\Sigma}}_{jj}, \quad \langle \gamma_j^{-1} \rangle = \hat{g}_j^{-1} + \hat{h}_j^{-1}, \quad \langle \mathbf{D}_{\tau}^{-1} \rangle = \text{diag}[\hat{g}_j]_{j=1:p} \quad (15)$$

The lower bound  $\tilde{F}(\boldsymbol{\Gamma})$  can be calculated very straightforwardly both for tracking the monotonic increase and for possibly setting a convergence criterion.

$$\begin{aligned} \tilde{F}(\boldsymbol{\Gamma}) &= \langle \ln p(\mathbf{y}|\mathbf{x}, \sigma^2) \rangle + \langle \ln p(\mathbf{x}|\sigma^2, \boldsymbol{\gamma}) \rangle + \langle \ln p(\boldsymbol{\gamma}) \rangle + \langle \ln p(\sigma^2) \rangle + \langle \ln p(\lambda^2) \rangle \\ &\quad - \langle \ln q^*(\mathbf{x}|-) \rangle - \langle \ln q^*(\boldsymbol{\gamma}|-) \rangle - \langle \ln q^*(\sigma^{-2}|-) \rangle - \langle \ln q^*(\lambda^2|-) \rangle \end{aligned} \quad (16)$$

where

$$\begin{aligned} \langle \ln p(\mathbf{y}|\mathbf{x}, \sigma^2) \rangle &= -\frac{n}{2} \ln 2\pi + \frac{n}{2} \langle \ln \sigma^{-2} \rangle - \frac{1}{2} \langle \sigma^{-2} \rangle \left( \|\mathbf{y} - \boldsymbol{\Phi} \hat{\boldsymbol{\mu}}\|_2^2 + \text{trace}(\boldsymbol{\Phi}^T \boldsymbol{\Phi} \hat{\boldsymbol{\Sigma}}) \right) \\ \langle \ln \sigma^{-2} \rangle &= \psi(\hat{a}) - \ln(\hat{b}), \quad \langle \sigma^{-2} \rangle = \hat{a}/\hat{b} \end{aligned} \quad (17)$$

and  $\psi(\cdot)$  is the digamma function.

$$\langle \ln p(\mathbf{x}|\sigma^2, \boldsymbol{\gamma}) \rangle = -\frac{p}{2} \ln 2\pi + \frac{p}{2} \langle \ln \sigma^{-2} \rangle + \frac{1}{2} \sum_{j=1}^p \langle \ln \gamma_j \rangle - \frac{1}{2} \langle \sigma^{-2} \rangle \text{trace} \left( \langle \mathbf{D}_{\tau}^{-1} \rangle \langle \mathbf{x} \mathbf{x}^T \rangle \right) \quad (18)$$

and those  $\langle \ln \gamma_j \rangle$  terms canceled out.

$$\begin{aligned} \langle \ln p(\boldsymbol{\gamma}) \rangle &= \sum_{j=1}^p \langle \log p(\gamma_j) \rangle = \sum_{j=1}^p \left( \langle \ln \frac{\lambda^2}{2} \rangle - \langle \gamma_j^{-1} \rangle \langle \frac{\lambda^2}{2} \rangle - 2 \langle \ln \gamma_j \rangle \right) \\ \langle \ln \lambda^2 \rangle &= \psi(\hat{r}) - \ln(\hat{s}) \end{aligned} \quad (19)$$

$$\langle \ln p(\sigma^{-2}) \rangle = \ln \left( \frac{b^a}{\Gamma(a)} \right) + (a-1) \langle \ln \sigma^{-2} \rangle - b \langle \sigma^{-2} \rangle \quad (20)$$

$$\langle \ln p(\lambda^2) \rangle = \ln \left( \frac{s^r}{\Gamma(r)} \right) + (r-1) \langle \ln \lambda^2 \rangle - s \langle \lambda^2 \rangle \quad (21)$$

$$-\langle \ln q^*(\mathbf{x}|-) \rangle = \frac{1}{2} \ln |2\pi e \hat{\boldsymbol{\Sigma}}| \quad (22)$$

$$-\langle \ln q^*(\boldsymbol{\gamma}|-) \rangle = -\sum_{j=1}^p \langle \ln q^*(\gamma_j|-) \rangle = \sum_{j=1}^p \left( -\frac{1}{2} \ln \hat{h}_j + \frac{1}{2} \ln 2\pi + \frac{3}{2} \langle \ln \gamma_j \rangle + 0.5 \right) \quad (23)$$

$$-\langle \ln q^*(\sigma^{-2}|-) \rangle = -\hat{a} \ln \hat{b} + \ln \Gamma(\hat{a}) - (\hat{a}-1) \langle \ln \sigma^{-2} \rangle + \hat{b} \langle \sigma^{-2} \rangle \quad (24)$$

$$-\langle \ln q^*(\lambda^2|-) \rangle = -\hat{r} \ln \hat{s} + \ln \Gamma(\hat{r}) - (\hat{r}-1) \langle \ln \lambda^2 \rangle + \hat{s} \langle \lambda^2 \rangle \quad (25)$$

## References

- [1] T. Park and G. Casella. The Bayesian Lasso. *J. Am. Statist. Assoc.*, 103(482):681–686, 2008.
